# Supplementary material
Source: Royal Society of Chemistry journal article supplement (doi:10.1039/d6fd00071a)
Supplement: d6fd00071a1.pdf [file d6fd00071a1.pdf]

Supplementary Material for

**Interfacial engineering for redirecting CO<sub>2</sub>  
electroreduction selectivity on boron-doped diamond:  
from formic acid to carbon monoxide**

Takashi Yamamoto,<sup>\*a</sup> Taiga Ozawa,<sup>a</sup> Mai Tomisaki<sup>b</sup> and Yasuaki Einaga<sup>\*a</sup>

<sup>a</sup>*Department of Chemistry, Keio University, Yokohama 223-8522, Japan.*

*E-mail: takyama@chem.keio.ac.jp (T.Y.); einaga@keio.jp (Y.E.)*

<sup>b</sup>*International Institute for Carbon-Neutral Energy Research (WPI-I2CNER), Kyushu University, Fukuoka  
819-0395, Japan.*

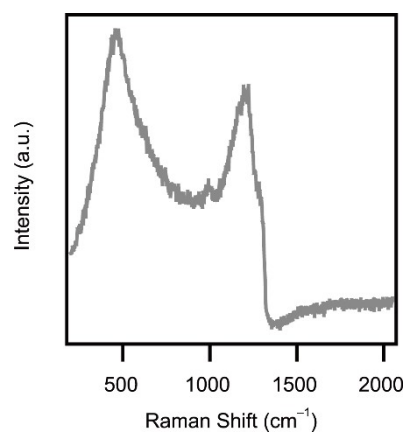

**Fig. S1** A Raman spectrum of a boron-doped diamond (BDD) electrode.

Peaks at around 500 and 1200 cm<sup>-1</sup> are attributed to the maxima of the phonon density of state of diamond. The peak at around 1330 cm<sup>-1</sup> is attributed to the zone-center optical phonon of diamond.

[S1] S. Praver, R. J. Nemanich, *Philos. Trans. R. Soc. A*, 2004, **362**, 2537–2565.

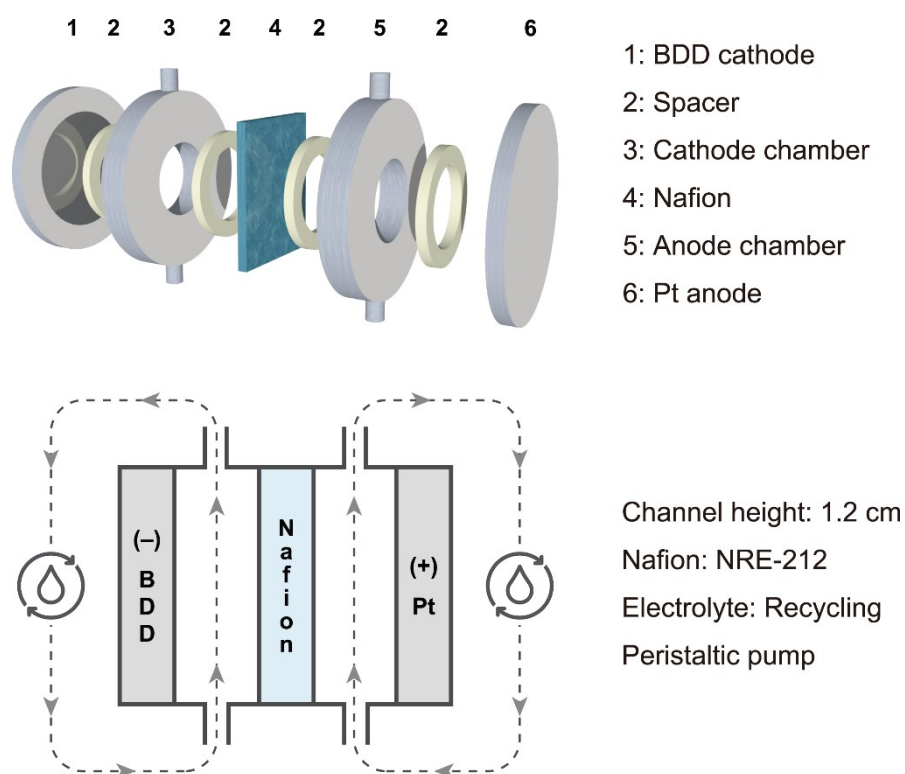

**Fig. S2** A schematic illustration of the two-compartment PTFE flow cell.

The electrolyte was circulated using a peristaltic pump, with the flow direction indicated by the arrows in Fig. S2. Both the cathode and anode chambers are 1.2 cm thick. Electrical contact was ensured by attaching Cu plates to the rear surfaces of the BDD electrode and the Pt plate.

[S2] K. Natsui, H. Iwakawa, N. Ikemiya, K. Nakata, Y. Einaga, *Angew. Chem. Int. Ed.*, 2018, **57**, 2639–2643

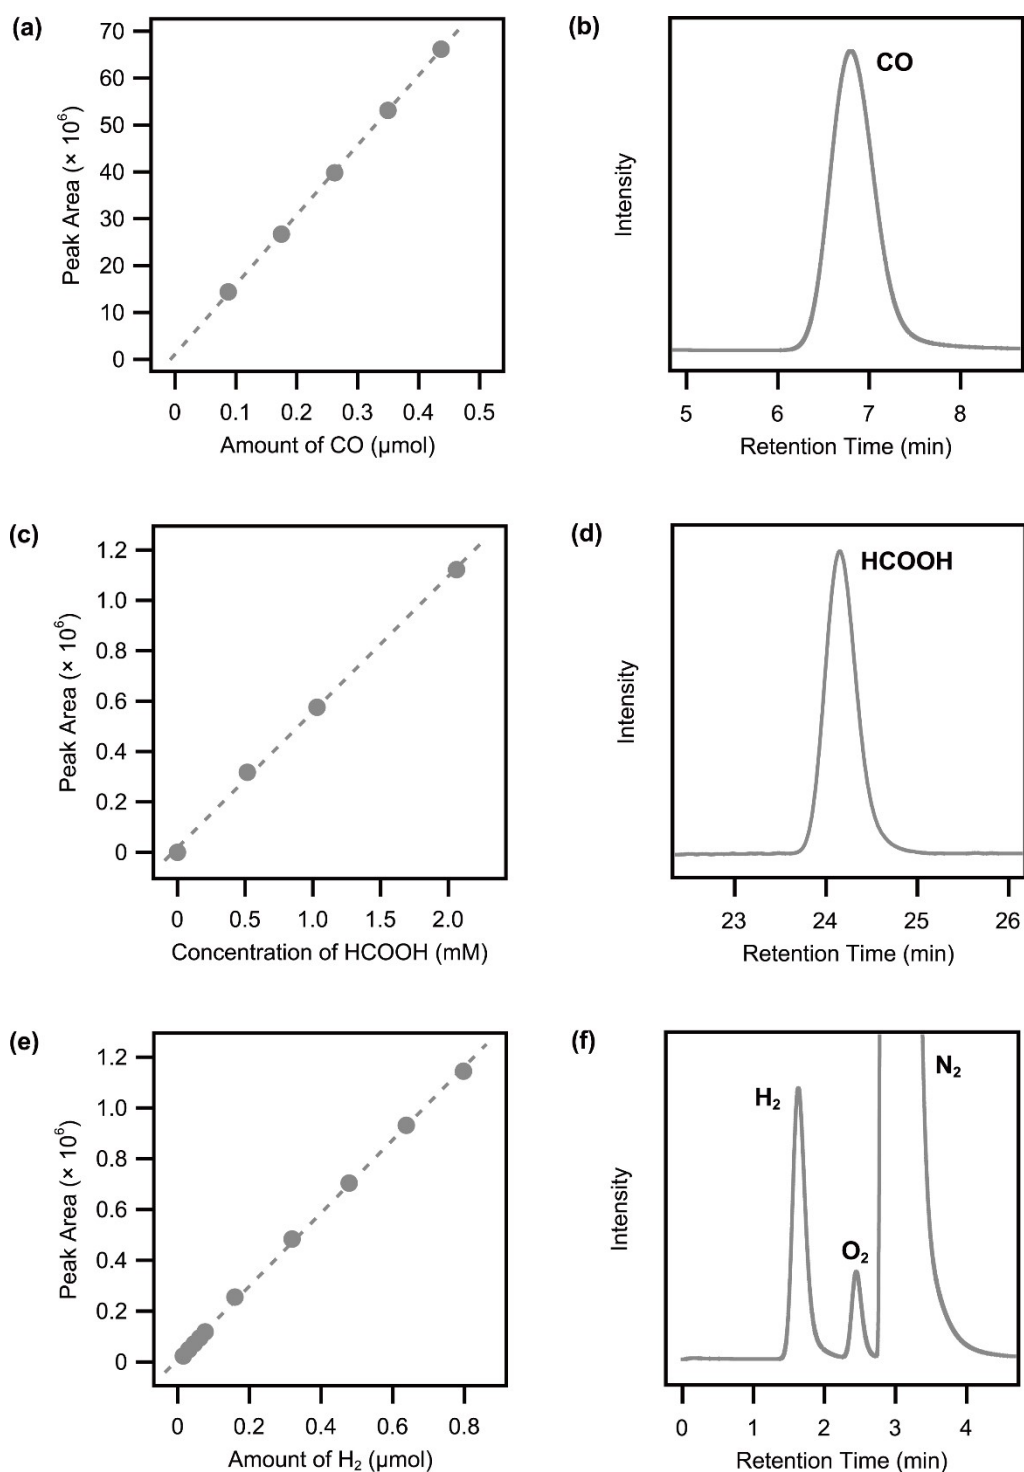

**Fig. S3** Calibration curves and chromatograms. (a) The calibration curve for CO, (b) A gas chromatogram for CO, (c) The calibration curve for HCOOH, (d) A high-performance liquid chromatogram for HCOOH, (e) The calibration curve for H<sub>2</sub>, and (f) A gas chromatogram for H<sub>2</sub>. Measurements are performed with the GC and HPLC systems described in the Methods section.

**Table S1** Detailed table of potential dependence on the eCO<sub>2</sub>RR products. Conditions: 0.1 M KClO<sub>4</sub> aqueous solution, electrolyte flow rate of 100 mL min<sup>-1</sup>, and operating temperature of 22 °C.

| Potential<br>(V vs. Ag/AgCl) | Potential<br>(V vs. RHE) | $j_{\text{Total}}^{[1]}$<br>(mA cm <sup>-2</sup> ) | $j_{\text{CO}}^{[2]}$<br>(mA cm <sup>-2</sup> ) | Electrolysis<br>Time (min) |
|------------------------------|--------------------------|----------------------------------------------------|-------------------------------------------------|----------------------------|
| -2.4                         | -1.96                    | -4.63                                              | -0.45                                           | 24                         |
| -2.2                         | -1.76                    | -4.98                                              | -0.65                                           | 24                         |
| -2.0                         | -1.56                    | -1.44                                              | -0.72                                           | 73                         |
| -1.9                         | -1.46                    | -0.82                                              | -0.49                                           | 128                        |
| -1.8                         | -1.36                    | -0.44                                              | -0.23                                           | 73                         |
| -1.6                         | -1.16                    | -0.09                                              | -0.03                                           | 671                        |

[1] Total current density, and [2] partial current density of CO production.

| Potential<br>(V vs. Ag/AgCl) | Potential<br>(V vs. RHE) | FE <sub>CO</sub> <sup>[1]</sup><br>(%) | SD <sup>[2]</sup><br>(%) | FE <sub>HCOOH</sub> <sup>[3]</sup><br>(%) | FE <sub>H<sub>2</sub></sub> <sup>[4]</sup><br>(%) |
|------------------------------|--------------------------|----------------------------------------|--------------------------|-------------------------------------------|---------------------------------------------------|
| -2.4                         | -1.96                    | 9                                      | 1.53                     | 2                                         | 82                                                |
| -2.2                         | -1.76                    | 13                                     | 1.15                     | 1                                         | 86                                                |
| -2.0                         | -1.56                    | 44                                     | 1.53                     | 4                                         | 40                                                |
| -1.9                         | -1.46                    | 53                                     | 0.58                     | 5                                         | 30                                                |
| -1.8                         | -1.36                    | 43                                     | 2.08                     | 9                                         | 29                                                |
| -1.6                         | -1.16                    | 17                                     | 2.31                     | 9                                         | 26                                                |

[1] Faradaic efficiency of CO production, and [2] standard deviation of FE<sub>CO</sub>, [3] Faradaic efficiency of HCOOH production, and [4] Faradaic efficiency of H<sub>2</sub> production. n = 3 for all investigations.

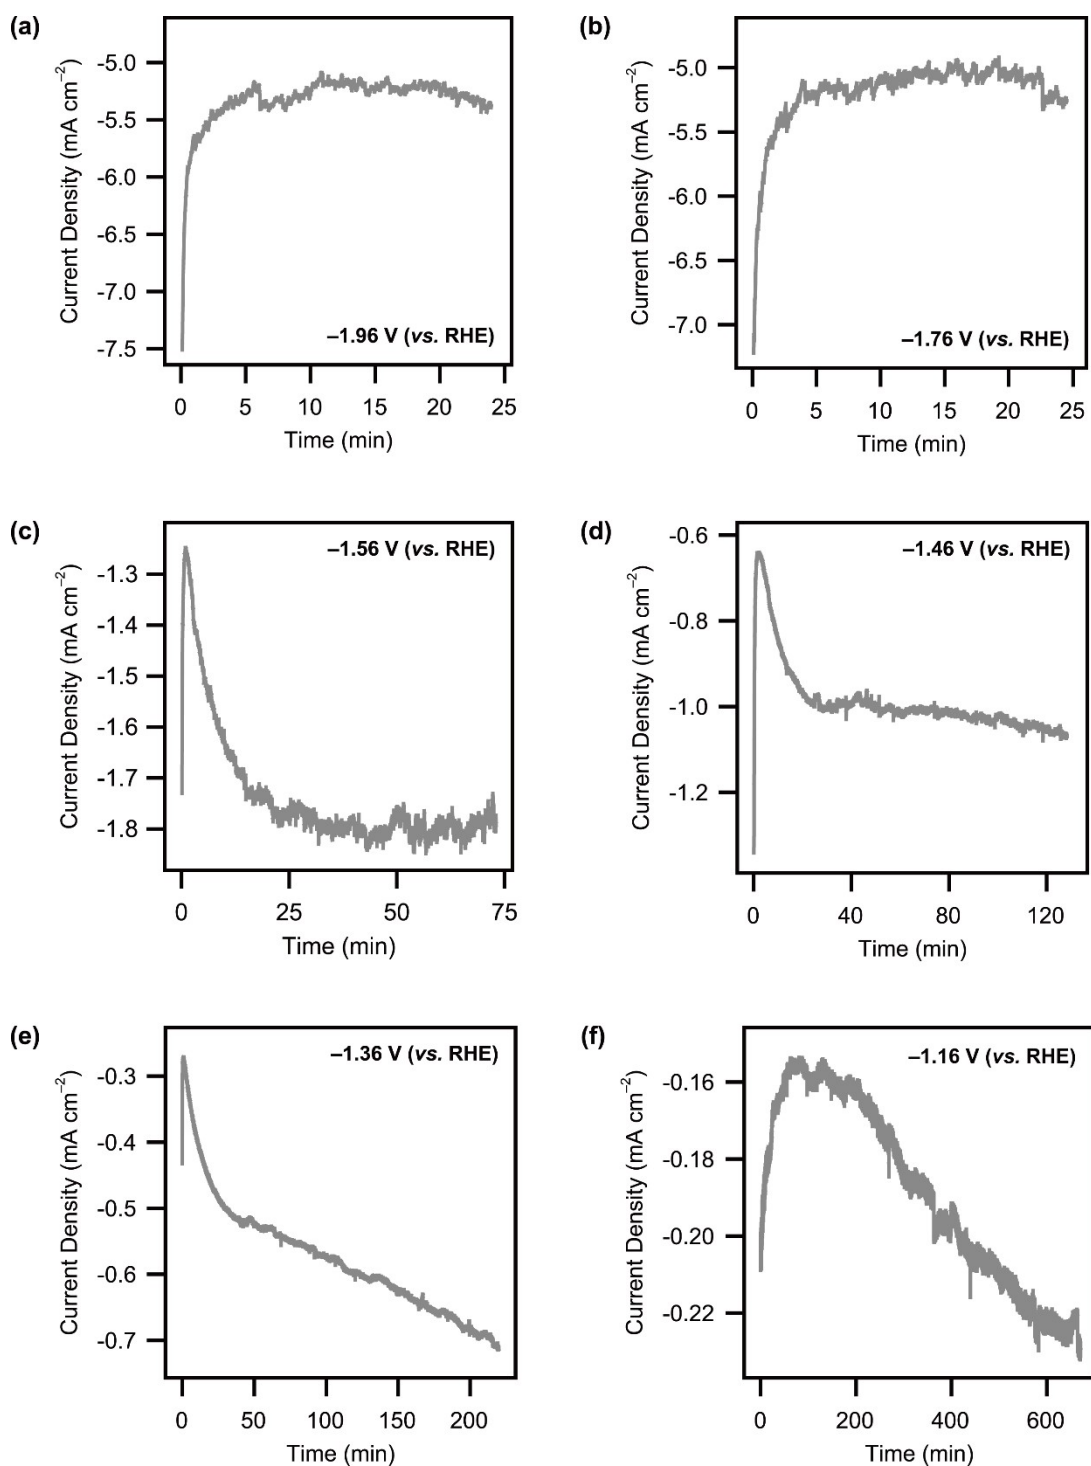

**Fig. S4** Chronoamperograms during the eCO<sub>2</sub>RR: (a) -1.96 V (vs. RHE), (b) -1.76 V (vs. RHE), (c) -1.56 V (vs. RHE), (d) -1.46 V (vs. RHE), (e) -1.36 V (vs. RHE), and (f) -1.16 V (vs. RHE). Other conditions: 0.1 M KClO<sub>4</sub> aqueous solution, electrolyte flow rate of 100 mL min<sup>-1</sup>, and operating temperature of 22 °C.

**Table S2** Detailed table of flow rate dependence on the eCO<sub>2</sub>RR products. Conditions: applied potential of  $-1.46$  V (vs. RHE),  $0.1$  M KClO<sub>4</sub> aqueous solution, and operating temperature of  $22$  °C.

| Flow Rate<br>(mL min <sup>-1</sup> ) | $j_{\text{Total}}$ [1]<br>(mA cm <sup>-2</sup> ) | $j_{\text{CO}}$ [2]<br>(mA cm <sup>-2</sup> ) | Electrolysis<br>Time (min) |
|--------------------------------------|--------------------------------------------------|-----------------------------------------------|----------------------------|
| 100                                  | -0.82                                            | -0.49                                         | 128                        |
| 200                                  | -0.96                                            | -0.62                                         | 116                        |
| 300                                  | -1.07                                            | -0.71                                         | 106                        |
| 400                                  | -1.26                                            | -0.90                                         | 92                         |
| 500                                  | -1.67                                            | -1.20                                         | 71                         |
| 600                                  | -2.10                                            | -1.42                                         | 58                         |

[1] Total current density, and [2] partial current density of CO production.

| Flow Rate<br>(mL min <sup>-1</sup> ) | FE <sub>CO</sub> [1]<br>(%) | SD [2]<br>(%) | FE <sub>HCOOH</sub> [3]<br>(%) | FE <sub>H<sub>2</sub></sub> [4]<br>(%) |
|--------------------------------------|-----------------------------|---------------|--------------------------------|----------------------------------------|
| 100                                  | 53                          | 0.58          | 5                              | 30                                     |
| 200                                  | 60                          | 2.65          | 10                             | 23                                     |
| 300                                  | 63                          | 1.73          | 15                             | 17                                     |
| 400                                  | 69                          | 2.08          | 17                             | 11                                     |
| 500                                  | 71                          | 1.15          | 16                             | 12                                     |
| 600                                  | 69                          | 1.53          | 28                             | 5                                      |

[1] Faradaic efficiency of CO production, and [2] standard deviation of FE<sub>CO</sub>, [3] Faradaic efficiency of HCOOH production, and [4] Faradaic efficiency of H<sub>2</sub> production.  $n = 3$  for all investigations.

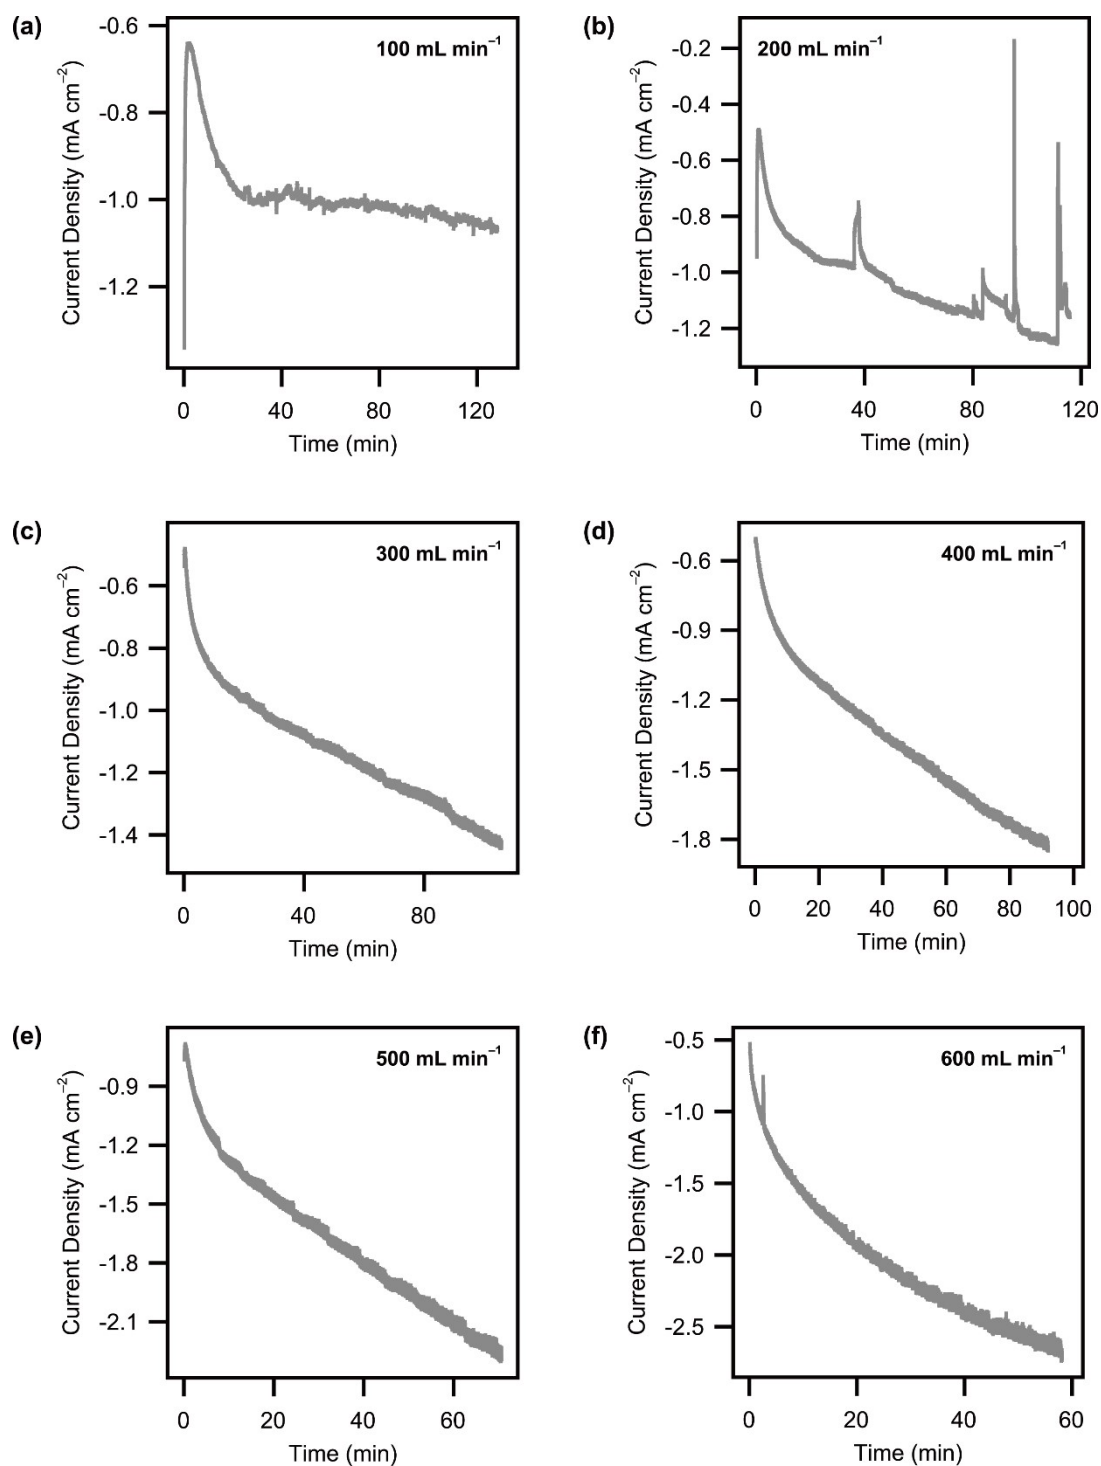

**Fig. S5** Chronoamperograms during the eCO<sub>2</sub>RR: (a) 100 mL min<sup>-1</sup>, (b) 200 mL min<sup>-1</sup>, (c) 300 mL min<sup>-1</sup>, (d) 400 mL min<sup>-1</sup>, (e) 500 mL min<sup>-1</sup>, and (f) 600 mL min<sup>-1</sup>. Other conditions: applied potential of -1.46 V (vs. RHE), 0.1 M KClO<sub>4</sub> aqueous solution, and operating temperature of 22 °C.

**Table S3** Detailed table of temperature dependence on the eCO<sub>2</sub>RR products. Conditions: applied potential of  $-1.46$  V (vs. RHE),  $0.1$  M KClO<sub>4</sub> aqueous solution, and electrolyte flow rate of  $500$  mL min<sup>-1</sup>.

| Temperature<br>(°C) | $j_{\text{Total}}$ <sup>[1]</sup><br>(mA cm <sup>-2</sup> ) | $j_{\text{CO}}$ <sup>[2]</sup><br>(mA cm <sup>-2</sup> ) | Electrolysis<br>Time (min) |
|---------------------|-------------------------------------------------------------|----------------------------------------------------------|----------------------------|
| 5                   | -1.37                                                       | -1.05                                                    | 82                         |
| 13                  | -1.39                                                       | -1.02                                                    | 84                         |
| 22                  | -1.63                                                       | -1.05                                                    | 72                         |
| 30                  | -2.23                                                       | -1.20                                                    | 53                         |

[1] Total current density, and [2] partial current density of CO production.

| Temperature<br>(°C) | FE <sub>CO</sub> <sup>[1]</sup><br>(%) | SD <sup>[2]</sup><br>(%) | FE <sub>HCOOH</sub> <sup>[3]</sup><br>(%) | FE <sub>H<sub>2</sub></sub> <sup>[4]</sup><br>(%) |
|---------------------|----------------------------------------|--------------------------|-------------------------------------------|---------------------------------------------------|
| 5                   | 72                                     | 0.58                     | 14                                        | 8                                                 |
| 13                  | 72                                     | 1.53                     | 15                                        | 11                                                |
| 22                  | 63                                     | 1.73                     | 12                                        | 23                                                |
| 30                  | 53                                     | 2.08                     | 14                                        | 32                                                |

[1] Faradaic efficiency of CO production, and [2] standard deviation of FE<sub>CO</sub>, [3] Faradaic efficiency of HCOOH production, and [4] Faradaic efficiency of H<sub>2</sub> production.  $n = 3$  for all investigations.

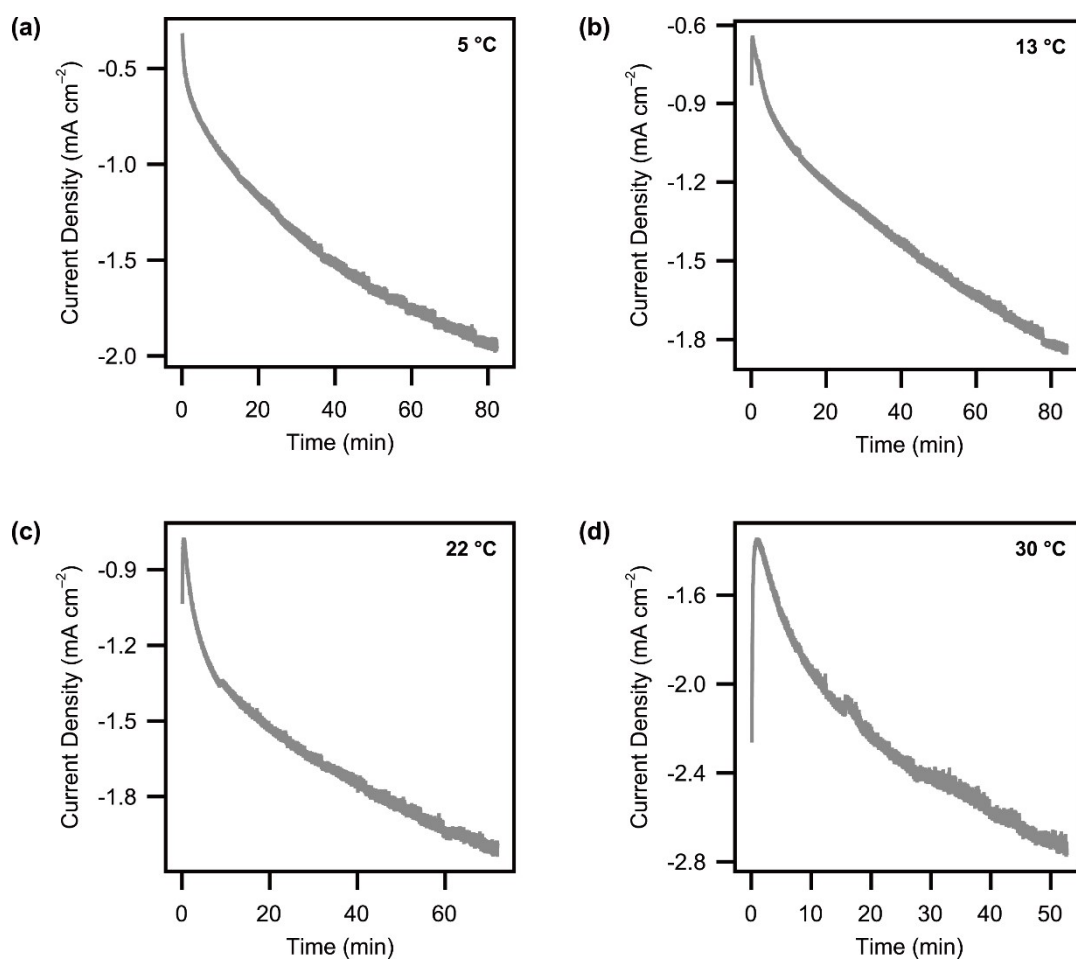

**Fig. S6** Chronoamperograms during the eCO<sub>2</sub>RR: (a) 5 °C, (b) 13 °C, (c) 22 °C, and (d) 30 °C. Other conditions: applied potential of -1.46 V (vs. RHE), 0.1 M KClO<sub>4</sub> aqueous solution, and electrolyte flow rate of 500 mL min<sup>-1</sup>.

**Table S4** Reproducibility of measurements of the diffusion layer thickness ( $\delta$ ) estimated from chronoamperometric measurements in 0.01 M  $\text{K}_3[\text{Fe}(\text{CN})_6]$  aqueous solution (pH 6.9) at  $-0.2$  V (vs. Ag/AgCl) and  $22$  °C. The static condition ( $0$  mL  $\text{min}^{-1}$ ) is included for reference.

| Flow Rate<br>(mL $\text{min}^{-1}$ ) | $\delta$ , Run 1<br>( $\mu\text{m}$ ) | $\delta$ , Run 2<br>( $\mu\text{m}$ ) | $\delta$ , Run 3<br>( $\mu\text{m}$ ) | Mean<br>( $\mu\text{m}$ ) | SD <sup>[1]</sup><br>( $\mu\text{m}$ ) |
|--------------------------------------|---------------------------------------|---------------------------------------|---------------------------------------|---------------------------|----------------------------------------|
| 0                                    | 714.3                                 | 725.2                                 | 718.0                                 | 719.2                     | 5.543                                  |
| 100                                  | 134.9                                 | 128.8                                 | 141.4                                 | 135.0                     | 6.301                                  |
| 200                                  | 91.79                                 | 102.6                                 | 94.70                                 | 96.37                     | 5.594                                  |
| 300                                  | 78.26                                 | 70.49                                 | 82.22                                 | 76.99                     | 5.972                                  |
| 400                                  | 75.07                                 | 71.67                                 | 64.11                                 | 70.28                     | 5.610                                  |
| 500                                  | 69.48                                 | 72.44                                 | 62.39                                 | 68.10                     | 5.164                                  |

[1] Standard deviation of  $\delta$ .
